# Supplementary material for: Obesity reversibly depletes the basal cell population and enhances mammary epithelial cell estrogen receptor alpha expression and progenitor activity
Source: PubMed Central journal article supplement (PMC5707907; doi:10.1186/s13058-017-0921-7), 2017-11-29

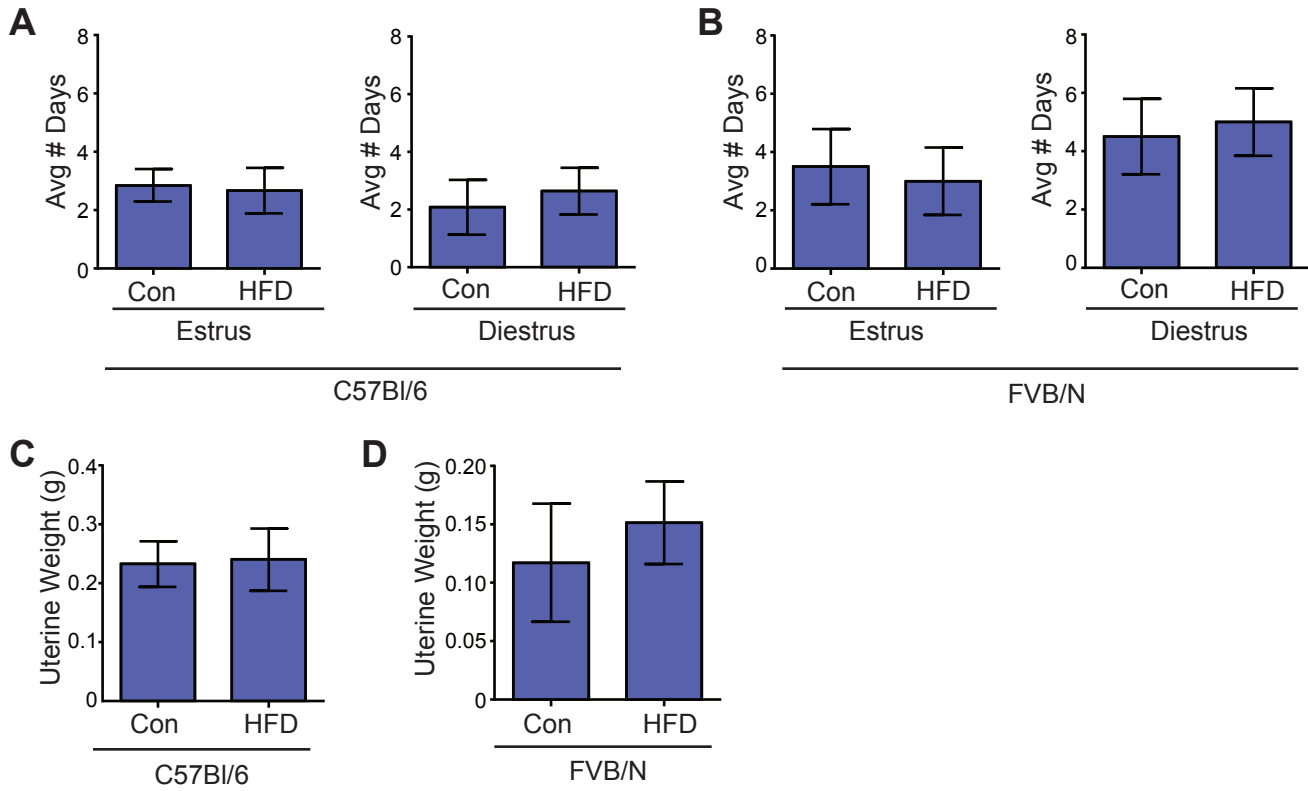

Supplement: 13058_2017_921_MOESM4_ESM.pdf [file 13058_2017_921_MOESM4_ESM.pdf]
