# Supplementary material for: Obesity reversibly depletes the basal cell population and enhances mammary epithelial cell estrogen receptor alpha expression and progenitor activity
Source: Springer Nature journal article supplement (doi:10.1186/s13058-017-0921-7), 2017-11-29

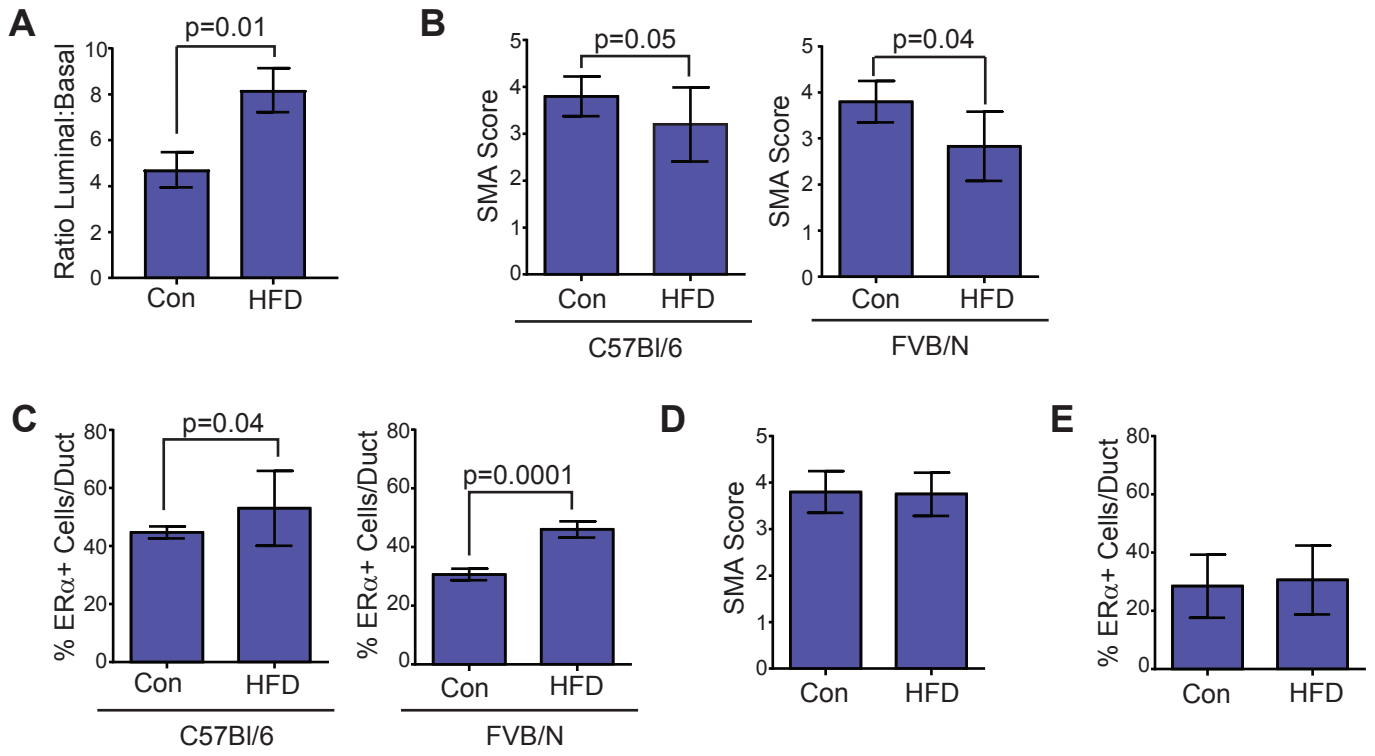

Supplement: MOESM5 [file 15265878]
